# Supplementary material for: Expression of Cancer Stem Cell Markers EpCAM and CD90 Is Correlated with Anti- and Pro-Oncogenic EphA2 Signaling in Hepatocellular Carcinoma
Source: MDPI journal article supplement (doi:10.3390/ijms22168652), 2021-08-11

EpCAM

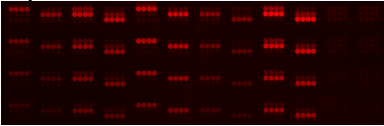

CD90

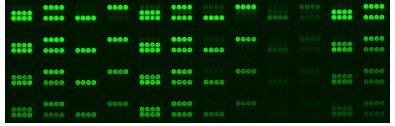

Phospho-EGFR

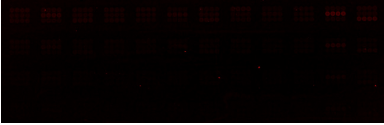

EGFR

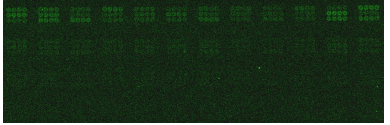

Phospho-ERK

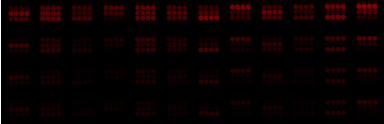

ERK

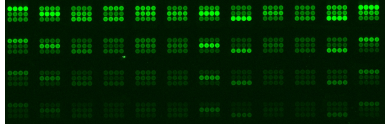

Phospho-AKT

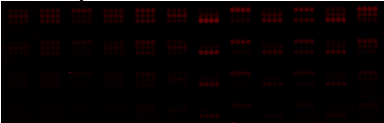

AKT

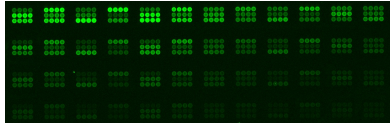

Phospho-MEK

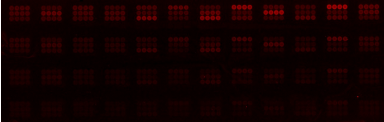

EphA2

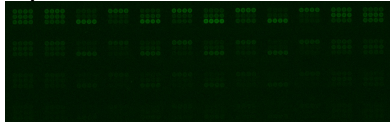

Phospho-EphA2-S897

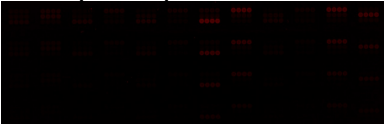

Phospho-EphA2-Y588

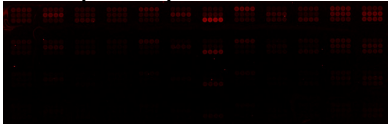

Phospho-RSK

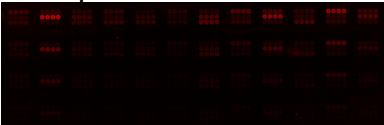

RSK

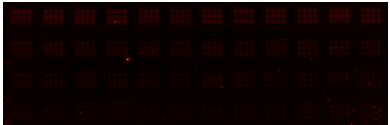

$\gamma$ Tubulin

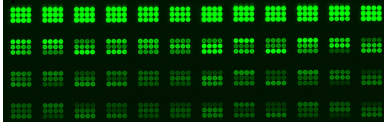

Supplement: s1 [file s1]
