# Supplementary figures and images for: Expression of Cancer Stem Cell Markers EpCAM and CD90 Is Correlated with Anti- and Pro-Oncogenic EphA2 Signaling in Hepatocellular Carcinoma
Source: MDPI journal article supplement (doi:10.3390/ijms22168652), 2021-08-11

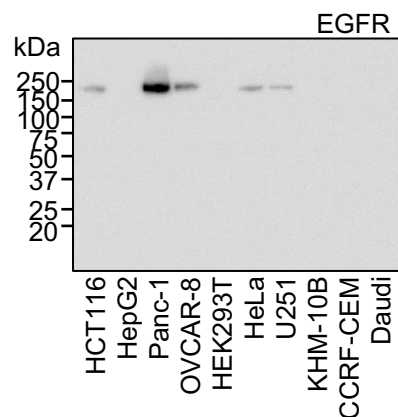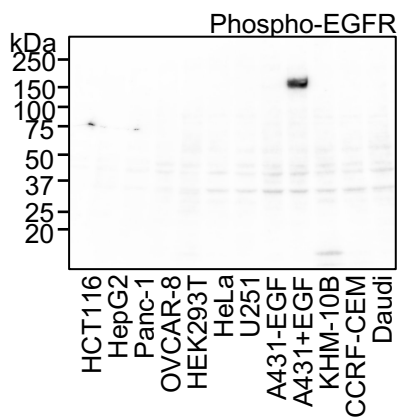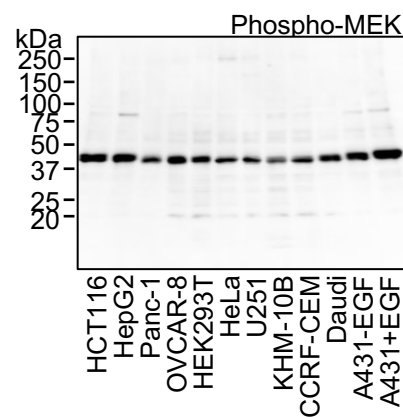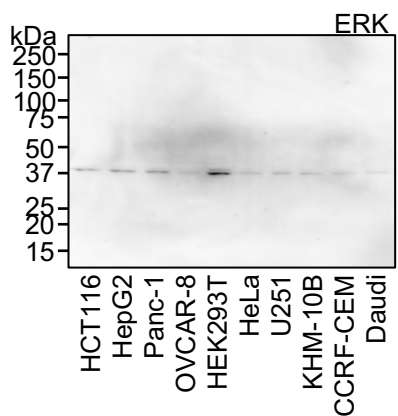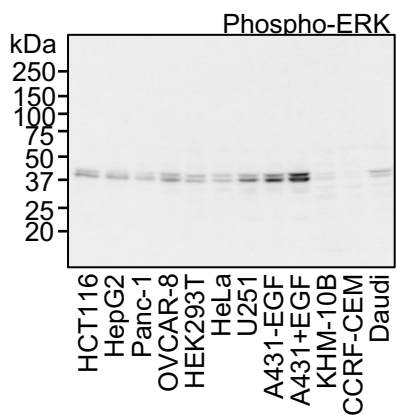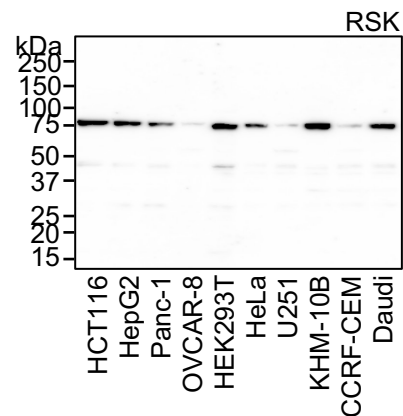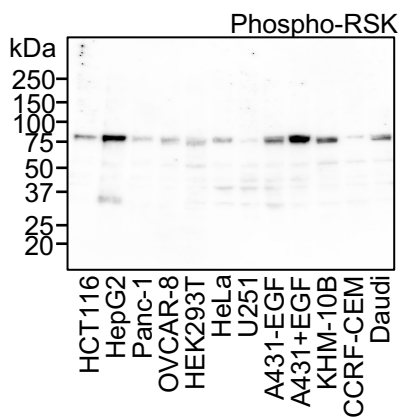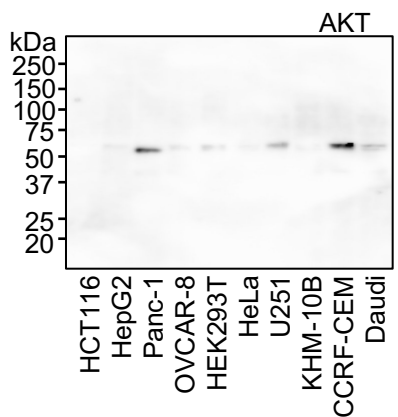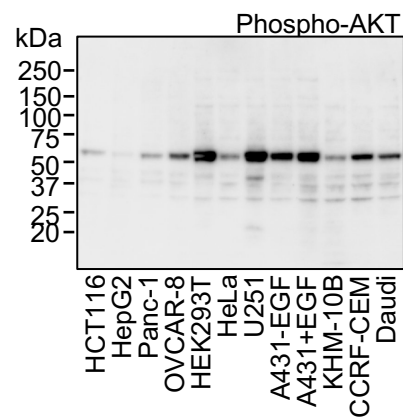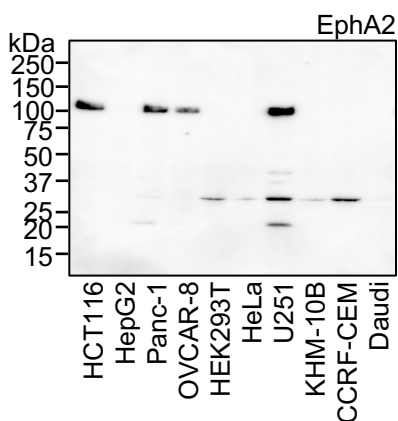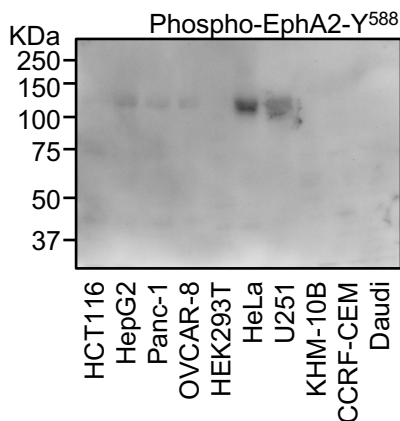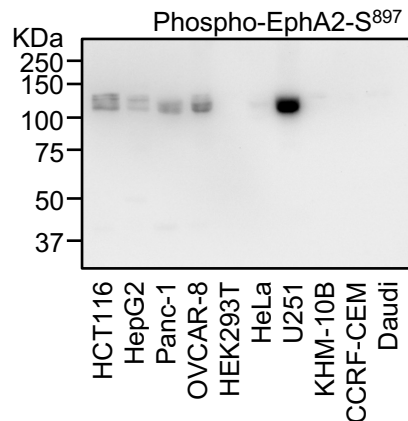

Supplement: s1 [file s1]

CD90

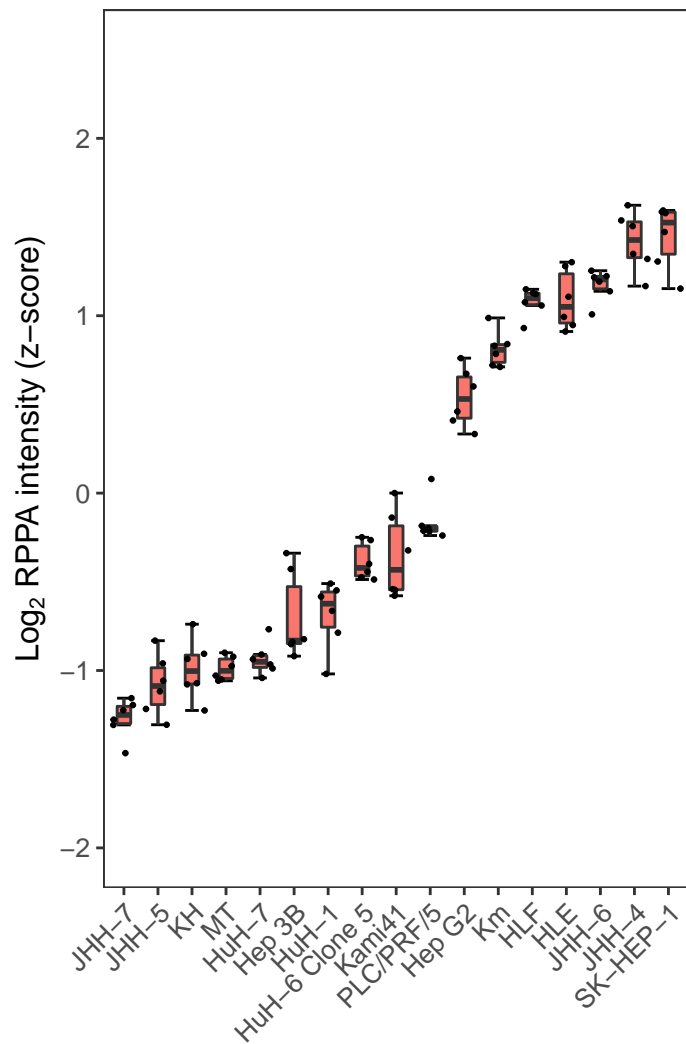

EpCAM

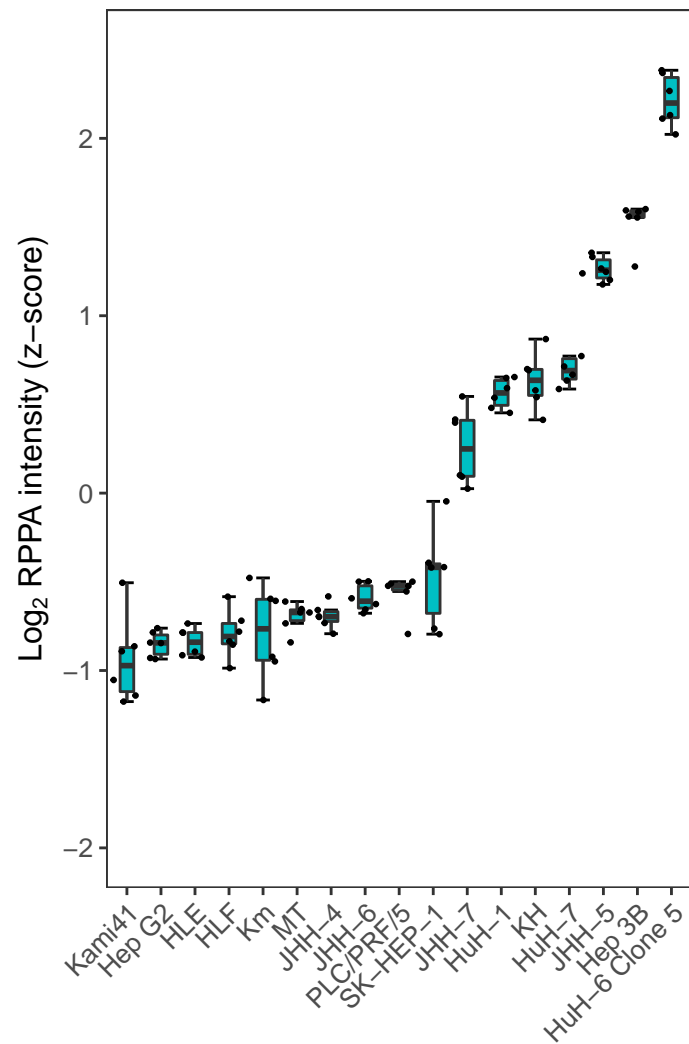

Supplement: s1 [file s1]
